# Supplementary material for: Relationship between the bandgap energy and photoluminescence properties of Pr3+-activated complex perovskite oxides by cation–nitrogen substitution
Source: Royal Society of Chemistry journal article supplement (doi:10.1039/d3nj05682a), 2024-01-01
Supplement: d3nj05682a1.pdf [file d3nj05682a1.pdf]

Supporting information (SI) for:

**Relationship between Bandgap and Photoluminescence Properties of Pr<sup>3+</sup>-activated Complex Perovskite Oxide by Cation–Nitrogen Substitution**

Suzuka Noda<sup>†ab</sup>, Yasushi Sato<sup>†a</sup>, Takuya Hasegawa<sup>b</sup>, Masato Kakihana<sup>bc</sup>, Shu Yin<sup>bd</sup>

<sup>a</sup> Department of Chemistry, Faculty of Science, Okayama University of Science, 1-1 Ridai-cho, Kita-ku, Okayama 700-0005, Japan

<sup>b</sup> Institute of Multidisciplinary Research for Advanced Materials, Tohoku University, 2-1-1 Katahira, Aoba-ku, Sendai 980-8577, Japan.

<sup>c</sup> SANKEN, Osaka University, 8-1 Mihogaoka, Ibaraki, Osaka 567-0047, Japan.

<sup>d</sup> Advanced Institute for Materials Research, Tohoku University, 2-1-1 Katahira, Aoba-ku, Sendai 980-8577, Japan.

†Corresponding author:

Dr. Yasushi Sato

E-mail: [satoy@ous.ac.jp](mailto:satoy@ous.ac.jp)

Ms. Suzuka Noda

E-mail: [noda.suzuka.r1@dc.tohoku.ac.jp](mailto:noda.suzuka.r1@dc.tohoku.ac.jp)

## Contents

Figure S1. Excitation ( $\lambda_{\text{em}} = 495 \text{ nm}$ ) and emission ( $\lambda_{\text{ex}} = 254 \text{ nm}$ ) spectra for  $\text{Pr}^{3+}$ -activated  $\text{CaTa}_{2/3}\text{Mg}_{1/3}\text{O}_3$  (CTMO) sample

Figure S2. (a) FE-SEM image and (b) enlarged image of the sample with  $x = 0.75$  ( $\text{CaTa}_{9/4}\text{Mg}_{3/4}\text{O}_{11/4}\text{N}_{1/4}$ )

Figure S3. (a) Excitation and emission spectra of  $\text{Pr}^{3+}$ -activated and undoped samples with  $x = 0.95$  ( $\text{CaTa}_{41/20}\text{Mg}_{19/20}\text{O}_{59/20}\text{N}_{1/20}$ ), and (b) their difference spectra between  $\text{Pr}^{3+}$ -activated and undoped ones

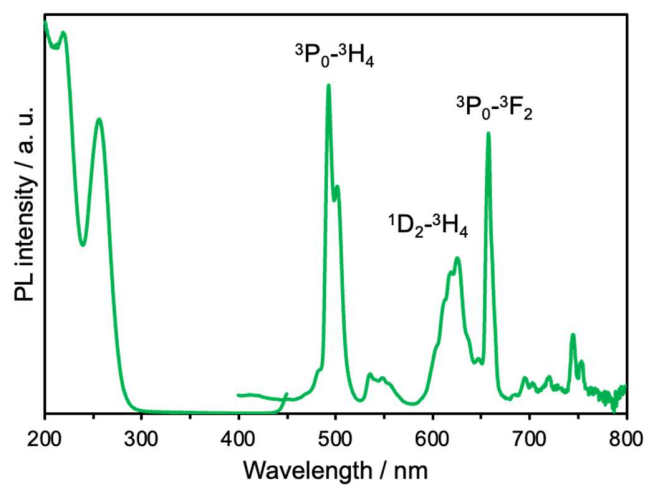

**Figure S1.** Excitation ( $\lambda_{em} = 495$  nm) and emission ( $\lambda_{ex} = 254$  nm) spectra for  $\text{Pr}^{3+}$ -activated  $\text{CaTa}_{2/3}\text{Mg}_{1/3}\text{O}_3$  (CTMO) sample

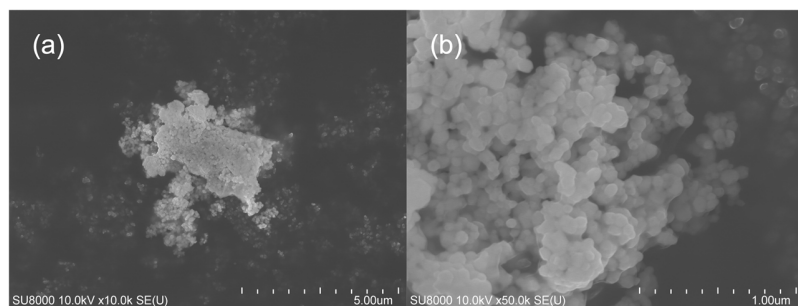

**Figure S2** (a) FE-SEM image and (b) enlarged image of the sample with  $x = 0.75$  ( $\text{CaTa}_{9/4}\text{Mg}_{3/4}\text{O}_{11/4}\text{N}_{1/4}$ )

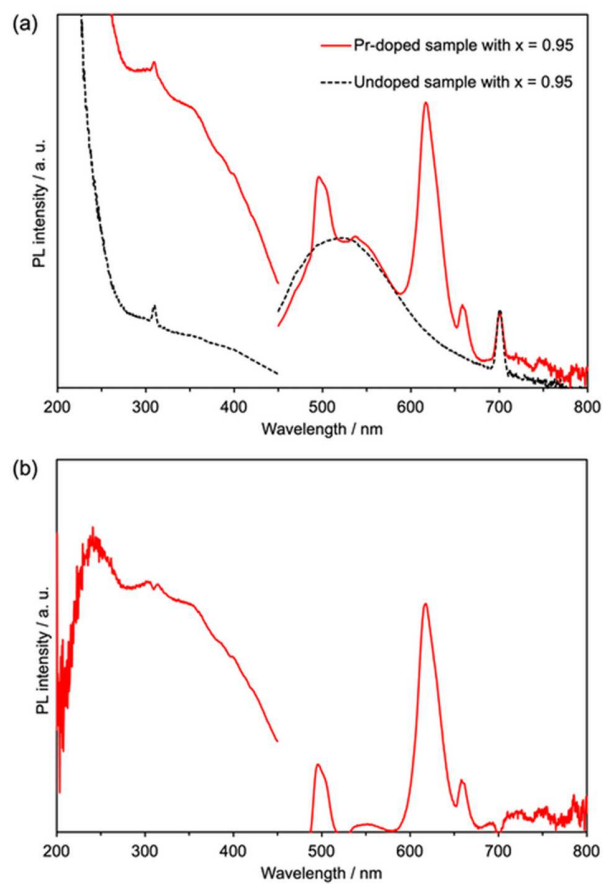

**Figure S3** (a) Excitation and emission spectra of  $\text{Pr}^{3+}$ -activated and undoped samples with  $x = 0.95$  ( $\text{CaTa}_{41/20}\text{Mg}_{19/20}\text{O}_{59/20}\text{N}_{1/20}$ ), and (b) their difference spectra between  $\text{Pr}^{3+}$ -activated and undoped ones
